# Supplementary material for: Do Parents Shape or Respond? Evidence for a Child-Driven Model of Literary Venue Engagement across Cultures
Source: Research Square preprint supplement (doi:10.21203/rs.3.rs-7392543/v1), 2025-09-24
Supplement: Supplementary file 1 [file 4f67e6f73e008ca523b30341.docx]

# Supplementary Information

# Supplementary Table S1. Mixed-Effects Models: Main Mediation Analysis (Standardized Variables)

# Supplementary Table S2. Comprehensive Robustness Check: Mixed-Effects Models Controlling for Parental Enjoyment and Academic Achievement (Standardized Variables)

#

# Supplementary Table S1. Mixed-Effects Models: Main Mediation Analysis (Standardized Variables)

## Model 1: Child Sex → Parental Bookstore/Library Visits

| **Parameter** | **Estimate** | **SE** | **df** | **t** | **p** | **95% CI** |
| --- | --- | --- | --- | --- | --- | --- |
| **Fixed Effects** |  |  |  |  |  |  |
| Intercept | -0.084 | 0.005 | 7.26 | -16.06 | < .001 | [-0.096, -0.071] |
| Child Sex (Girl = 1) | 0.167 | 0.011 | 8.62 | 15.77 | < .001 | [0.143, 0.191] |

| **Random Effects** | **Variance** | **SE** |
| --- | --- | --- |
| Intercept (Country) | 0.000 | 0.000 |
| Child Sex Slope (Country) | 0.001 | 0.001 |
| Residual | 0.991 | 0.005 |

*Note.* Sample Size: N = 82,470 (14 countries). Marginal R² = 0.007. Conditional R² = 0.007. ICC = 0.000.

## Model 2: Child Sex → Parental Bookstore/Library Visits controlling for Child Bookstore/Library Enjoyment

| **Parameter** | **Estimate** | **SE** | **df** | **t** | **p** | **95% CI** |
| --- | --- | --- | --- | --- | --- | --- |
| **Fixed Effects** |  |  |  |  |  |  |
| Intercept | -0.034 | 0.005 | 82,467 | -6.95 | < .001 | [-0.044, -0.025] |
| Child Bookstore/Library Enjoyment | 0.186 | 0.017 | 82,467 | 10.88 | < .001 | [0.153, 0.220] |
| Child Sex (Girl = 1) | 0.063 | 0.007 | 82,467 | 8.88 | < .001 | [0.049, 0.077] |

| **Random Effects** | **Variance** | **SE** |
| --- | --- | --- |
| Intercept (Country) | 0.000 | 0.000 |
| Child Sex Slope (Country) | 0.000 | 0.000 |
| Child Enjoyment Slope | 0.004 | 0.002 |
| Residual | 0.956 | 0.005 |

*Note.* Sample Size: N = 82,470 (14 countries). Marginal R² = 0.039. Conditional R² = 0.043. ICC = 0.004.

## Model 3: Child Sex → Child Bookstore/Library Enjoyment

| **Parameter** | **Estimate** | **SE** | **df** | **t** | **p** | **95% CI** |
| --- | --- | --- | --- | --- | --- | --- |
| **Fixed Effects** |  |  |  |  |  |  |
| Intercept | -0.244 | 0.021 | 12.76 | -11.63 | < .001 | [-0.289, -0.198] |
| Child Sex (Girl = 1) | 0.535 | 0.040 | 12.77 | 13.29 | < .001 | [0.448, 0.622] |

| **Random Effects** | **Variance** | **SE** |
| --- | --- | --- |
| Intercept (Country) | 0.006 | 0.002 |
| Child Sex Slope (Country) | 0.022 | 0.009 |
| Residual | 0.914 | 0.005 |

*Note.* Sample Size: N = 82,470 (14 countries). Marginal R² = 0.071. Conditional R² = 0.088. ICC = 0.018.

## Model 4: Child Sex → Child Bookstore/Library Enjoyment controlling for Parental Bookstore/Library Visits

| **Parameter** | **Estimate** | **SE** | **df** | **t** | **p** | **95% CI** |
| --- | --- | --- | --- | --- | --- | --- |
| **Fixed Effects** |  |  |  |  |  |  |
| Intercept | -0.228 | 0.020 | 12.67 | -11.39 | < .001 | [-0.272, -0.185] |
| Parental Bookstore/Library Visits | 0.172 | 0.015 | 12.74 | 11.18 | < .001 | [0.139, 0.206] |
| Child Sex (Girl = 1) | 0.503 | 0.038 | 12.75 | 13.30 | < .001 | [0.421, 0.585] |

| **Random Effects** | **Variance** | **SE** |
| --- | --- | --- |
| Intercept (Country) | 0.005 | 0.002 |
| Child Sex Slope (Country) | 0.019 | 0.008 |
| Parental Visits Slope | 0.003 | 0.001 |
| Residual | 0.882 | 0.004 |

*Note.* Sample Size: N = 82,470 (14 countries). Marginal R² = 0.100. Conditional R² = 0.118. ICC = 0.020.

## Summary of Mediation Effects

| **Pathway** | **Total Effect (c)** | **Direct Effect (c')** | **Indirect Effect (ab)** | **Proportion Mediated** |
| --- | --- | --- | --- | --- |
| Child-Driven | 0.167 | 0.063 | 0.104 | 62.3% |
| Parent-Shaping | 0.535 | 0.503 | 0.032 | 6.0% |

*Note.* All models estimated using REML with Satterthwaite degrees of freedom. Countries: Chile, Germany, Denmark, Hong Kong, Croatia, Hungary, Italy, Korea, Lithuania, Macao-China, New Zealand, Panama, Portugal, Qatar. Child Sex coded 0 = Boy, 1 = Girl. All continuous variables standardized within countries before analysis. Parental Bookstore/Library Visits: standardized frequency of visits. Child Bookstore/Library Enjoyment: standardized enjoyment ratings.

# Supplementary Table S2. Comprehensive Robustness Check: Mixed-Effects Models Controlling for Parental Enjoyment and Academic Achievement (Standardized Variables)

## Model 5: Child Sex → Parental Bookstore/Library Visits controlling for Parental Enjoyment and Academic Achievement

| **Parameter** | **Estimate** | **SE** | **df** | **t** | **p** | **95% CI** |
| --- | --- | --- | --- | --- | --- | --- |
| **Fixed Effects** |  |  |  |  |  |  |
| Intercept | -0.065 | 0.005 | 82,465 | -12.86 | < .001 | [-0.075, -0.055] |
| Child Sex (Girl = 1) | 0.131 | 0.008 | 82,465 | 17.36 | < .001 | [0.116, 0.146] |
| Parental Bookstore/Library Enjoyment | 0.275 | 0.015 | 82,465 | 18.19 | < .001 | [0.245, 0.304] |
| Math Achievement | -0.061 | 0.013 | 82,465 | -4.54 | < .001 | [-0.087, -0.034] |
| Reading Achievement | 0.065 | 0.019 | 82,465 | 3.50 | < .001 | [0.029, 0.102] |

| **Random Effects** | **Variance** | **SE** |
| --- | --- | --- |
| Intercept (Country) | 0.000 | 0.000 |
| Child Sex Slope (Country) | 0.000 | 0.000 |
| Parental Enjoyment Slope | 0.003 | 0.001 |
| Math Achievement Slope | 0.002 | 0.001 |
| Reading Achievement Slope | 0.004 | 0.002 |
| Residual | 0.907 | 0.004 |

*Note.* Sample Size: N = 82,470 (14 countries). Marginal R² = 0.084. Conditional R² = 0.093. ICC = 0.009.

## Model 6: Child Sex → Parental Bookstore/Library Visits controlling for Child Enjoyment, Parental Enjoyment, and Academic Achievement

| **Parameter** | **Estimate** | **SE** | **df** | **t** | **p** | **95% CI** |
| --- | --- | --- | --- | --- | --- | --- |
| **Fixed Effects** |  |  |  |  |  |  |
| Intercept | -0.032 | 0.005 | 82,464 | -6.30 | < .001 | [-0.042, -0.022] |
| Child Bookstore/Library Enjoyment | 0.147 | 0.016 | 82,464 | 9.20 | < .001 | [0.116, 0.179] |
| Child Sex (Girl = 1) | 0.064 | 0.008 | 82,464 | 8.40 | < .001 | [0.049, 0.079] |
| Parental Bookstore/Library Enjoyment | 0.258 | 0.015 | 82,464 | 17.07 | < .001 | [0.228, 0.288] |
| Math Achievement | -0.057 | 0.013 | 82,464 | -4.38 | < .001 | [-0.082, -0.031] |
| Reading Achievement | 0.031 | 0.015 | 82,464 | 2.08 | .038 | [0.002, 0.061] |

| **Random Effects** | **Variance** | **SE** |
| --- | --- | --- |
| Intercept (Country) | 0.000 | 0.000 |
| Child Sex Slope (Country) | 0.000 | 0.000 |
| Child Enjoyment Slope | 0.003 | 0.001 |
| Parental Enjoyment Slope | 0.003 | 0.001 |
| Math Achievement Slope | 0.002 | 0.001 |
| Reading Achievement Slope | 0.002 | 0.001 |
| Residual | 0.887 | 0.004 |

*Note.* Sample Size: N = 82,470 (14 countries). Marginal R² = 0.103. Conditional R² = 0.113. ICC = 0.011.

## Model 7: Child Sex → Child Bookstore/Library Enjoyment controlling for Parental Enjoyment and Academic Achievement

| **Parameter** | **Estimate** | **SE** | **df** | **t** | **p** | **95% CI** |
| --- | --- | --- | --- | --- | --- | --- |
| **Fixed Effects** |  |  |  |  |  |  |
| Intercept | -0.218 | 0.018 | 12.41 | -12.18 | < .001 | [-0.257, -0.179] |
| Child Sex (Girl = 1) | 0.449 | 0.031 | 12.63 | 14.38 | < .001 | [0.381, 0.516] |
| Parental Bookstore/Library Enjoyment | 0.118 | 0.009 | 13.15 | 13.14 | < .001 | [0.098, 0.137] |
| Math Achievement | -0.018 | 0.016 | 13.00 | -1.13 | .280 | [-0.052, 0.016] |
| Reading Achievement | 0.204 | 0.028 | 12.87 | 7.29 | < .001 | [0.144, 0.265] |

| **Random Effects** | **Variance** | **SE** |
| --- | --- | --- |
| Intercept (Country) | 0.004 | 0.002 |
| Child Sex Slope (Country) | 0.013 | 0.005 |
| Parental Enjoyment Slope | 0.001 | 0.000 |
| Math Achievement Slope | 0.003 | 0.001 |
| Reading Achievement Slope | 0.010 | 0.004 |
| Residual | 0.852 | 0.004 |

*Note.* Sample Size: N = 82,470 (14 countries). Marginal R² = 0.124. Conditional R² = 0.148. ICC = 0.027.

## Model 8: Child Sex → Child Bookstore/Library Enjoyment controlling for Parental Visits, Parental Enjoyment, and Academic Achievement

| **Parameter** | **Estimate** | **SE** | **df** | **t** | **p** | **95% CI** |
| --- | --- | --- | --- | --- | --- | --- |
| **Fixed Effects** |  |  |  |  |  |  |
| Intercept | -0.208 | 0.017 | 12.41 | -12.25 | < .001 | [-0.244, -0.171] |
| Parental Bookstore/Library Visits | 0.138 | 0.014 | 12.54 | 9.99 | < .001 | [0.108, 0.168] |
| Child Sex (Girl = 1) | 0.428 | 0.030 | 12.63 | 14.22 | < .001 | [0.363, 0.493] |
| Parental Bookstore/Library Enjoyment | 0.080 | 0.011 | 13.12 | 7.57 | < .001 | [0.057, 0.102] |
| Math Achievement | -0.010 | 0.016 | 12.74 | -0.62 | .548 | [-0.043, 0.024] |
| Reading Achievement | 0.194 | 0.026 | 12.87 | 7.50 | < .001 | [0.138, 0.250] |

| **Random Effects** | **Variance** | **SE** |
| --- | --- | --- |
| Intercept (Country) | 0.004 | 0.002 |
| Child Sex Slope (Country) | 0.012 | 0.005 |
| Parental Visits Slope | 0.002 | 0.001 |
| Parental Enjoyment Slope | 0.001 | 0.001 |
| Math Achievement Slope | 0.003 | 0.001 |
| Reading Achievement Slope | 0.009 | 0.004 |
| Residual | 0.834 | 0.004 |

*Note.* Sample Size: N = 82,470 (14 countries). Marginal R² = 0.141. Conditional R² = 0.166. ICC = 0.028.

## Summary of Comprehensive Robustness Check

| **Pathway** | **Total Effect (c)** | **Direct Effect (c')** | **Indirect Effect (ab)** | **Proportion Mediated** |
| --- | --- | --- | --- | --- |
| Child-Driven (with all controls) | 0.131 | 0.064 | 0.067 | 51.1% |
| Parent-Shaping (with all controls) | 0.449 | 0.428 | 0.021 | 4.7% |

*Note.* All models estimated using REML with Satterthwaite degrees of freedom. Countries: Chile, Germany, Denmark, Hong Kong, Croatia, Hungary, Italy, Korea, Lithuania, Macao-China, New Zealand, Panama, Portugal, Qatar. Child Sex coded 0 = Boy, 1 = Girl. All continuous variables standardized within countries before analysis. Controls include parental bookstore/library enjoyment, mathematics achievement, and reading achievement. The child-driven pathway shows more than 10-fold stronger mediation (51.1% vs. 4.7%) even under comprehensive controls.
